# Supplementary material for: ShadowEth: Private Smart Contract on Public Blockchain
Source: Springer Nature journal article supplement (doi:10.1007/s11390-018-1839-y), 2018-05-01
Supplement: 11390_2018_1839_MOESM1_ESM.pdf [file 11390_2018_1839_MOESM1_ESM.pdf]

# ShadowEth: Private Smart Contract on Public Blockchain

**Rui Yuan(袁睿)**

Institute of Parallel and  
Distributed  
Systems, Shanghai Jiao  
Tong University

**Yu-Bin Xia(夏虞斌)**

Institute of Parallel and  
Distributed  
Systems, Shanghai Jiao  
Tong University

**Hai-Bo Chen(陈海波)**

Institute of Parallel and  
Distributed Systems, Shanghai  
Jiao Tong University

**Bing-yu Zang(臧斌宇)**

Institute of Parallel and  
Distributed Systems, Shanghai  
Jiao Tong University

**Jan Xie(谢晗剑)**

Cryptape Inc.

Yuan R, Xia YB, Chen HB et al. ShadowEth: Private smart contract on public blockchain. JOURNAL OF COMPUTER SCIENCE AND TECHNOLOGY 33(3): 542–556 May 2018. DOI 10.1007/s11390-018-1839-y

# Confidentiality of smart contracts ?

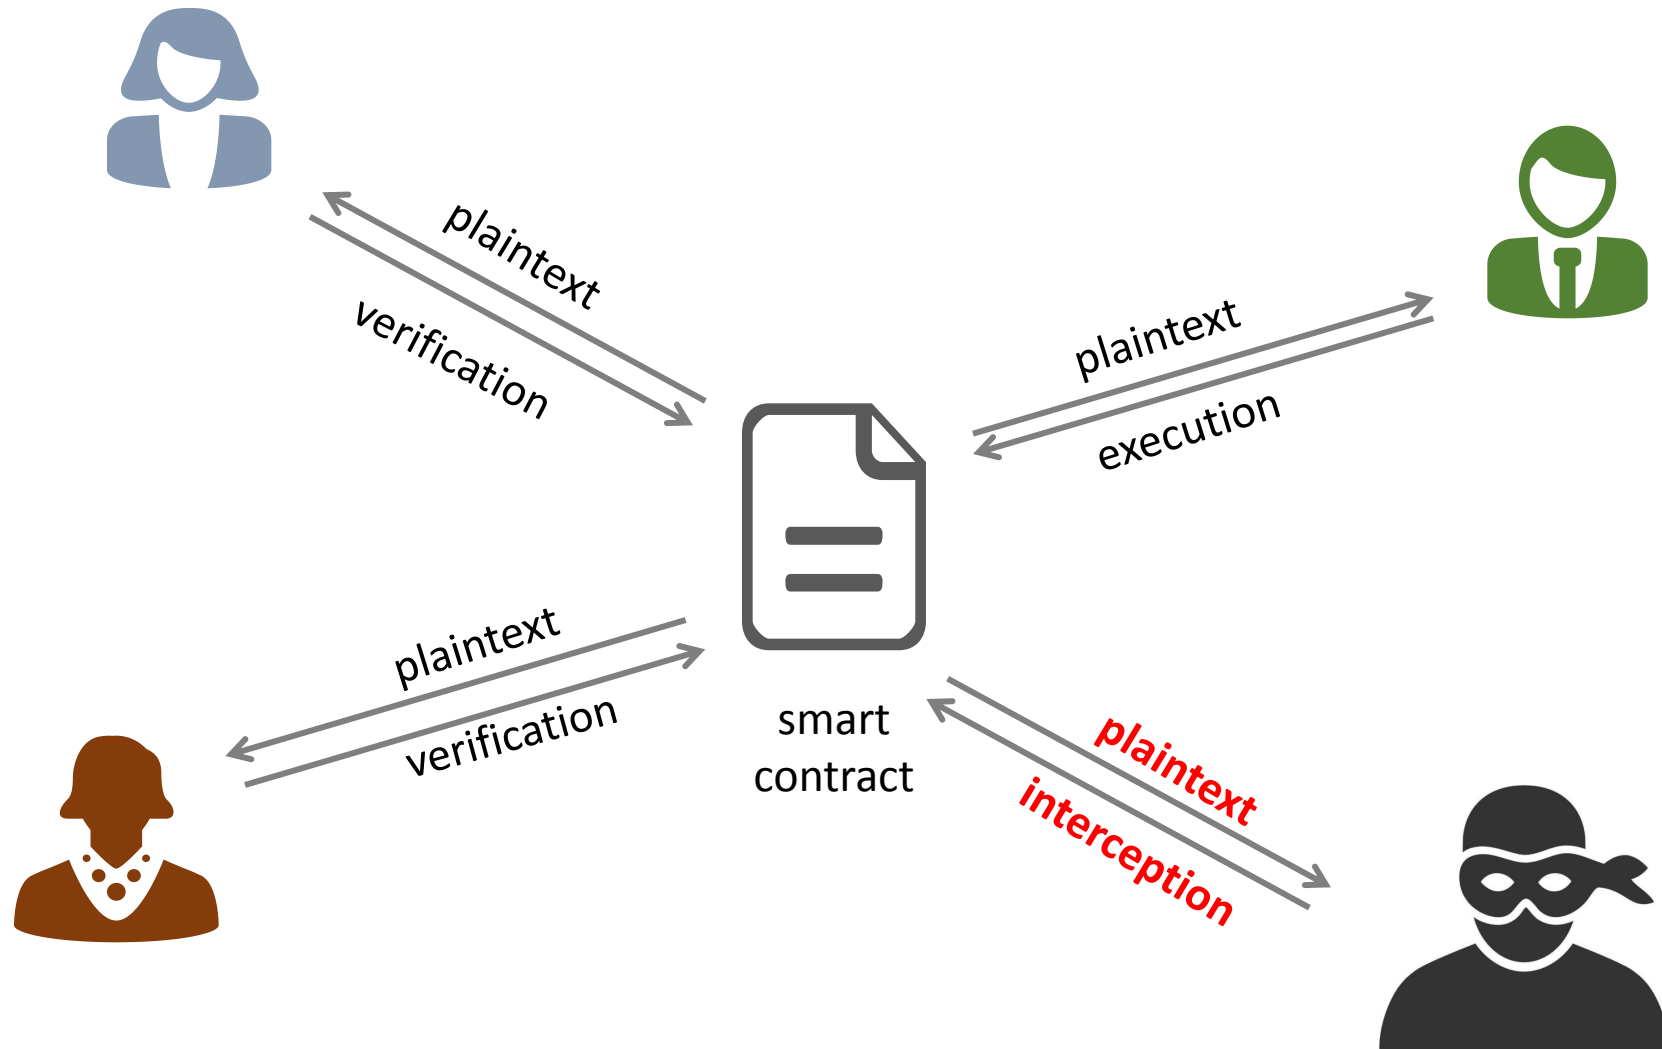

# Key Idea

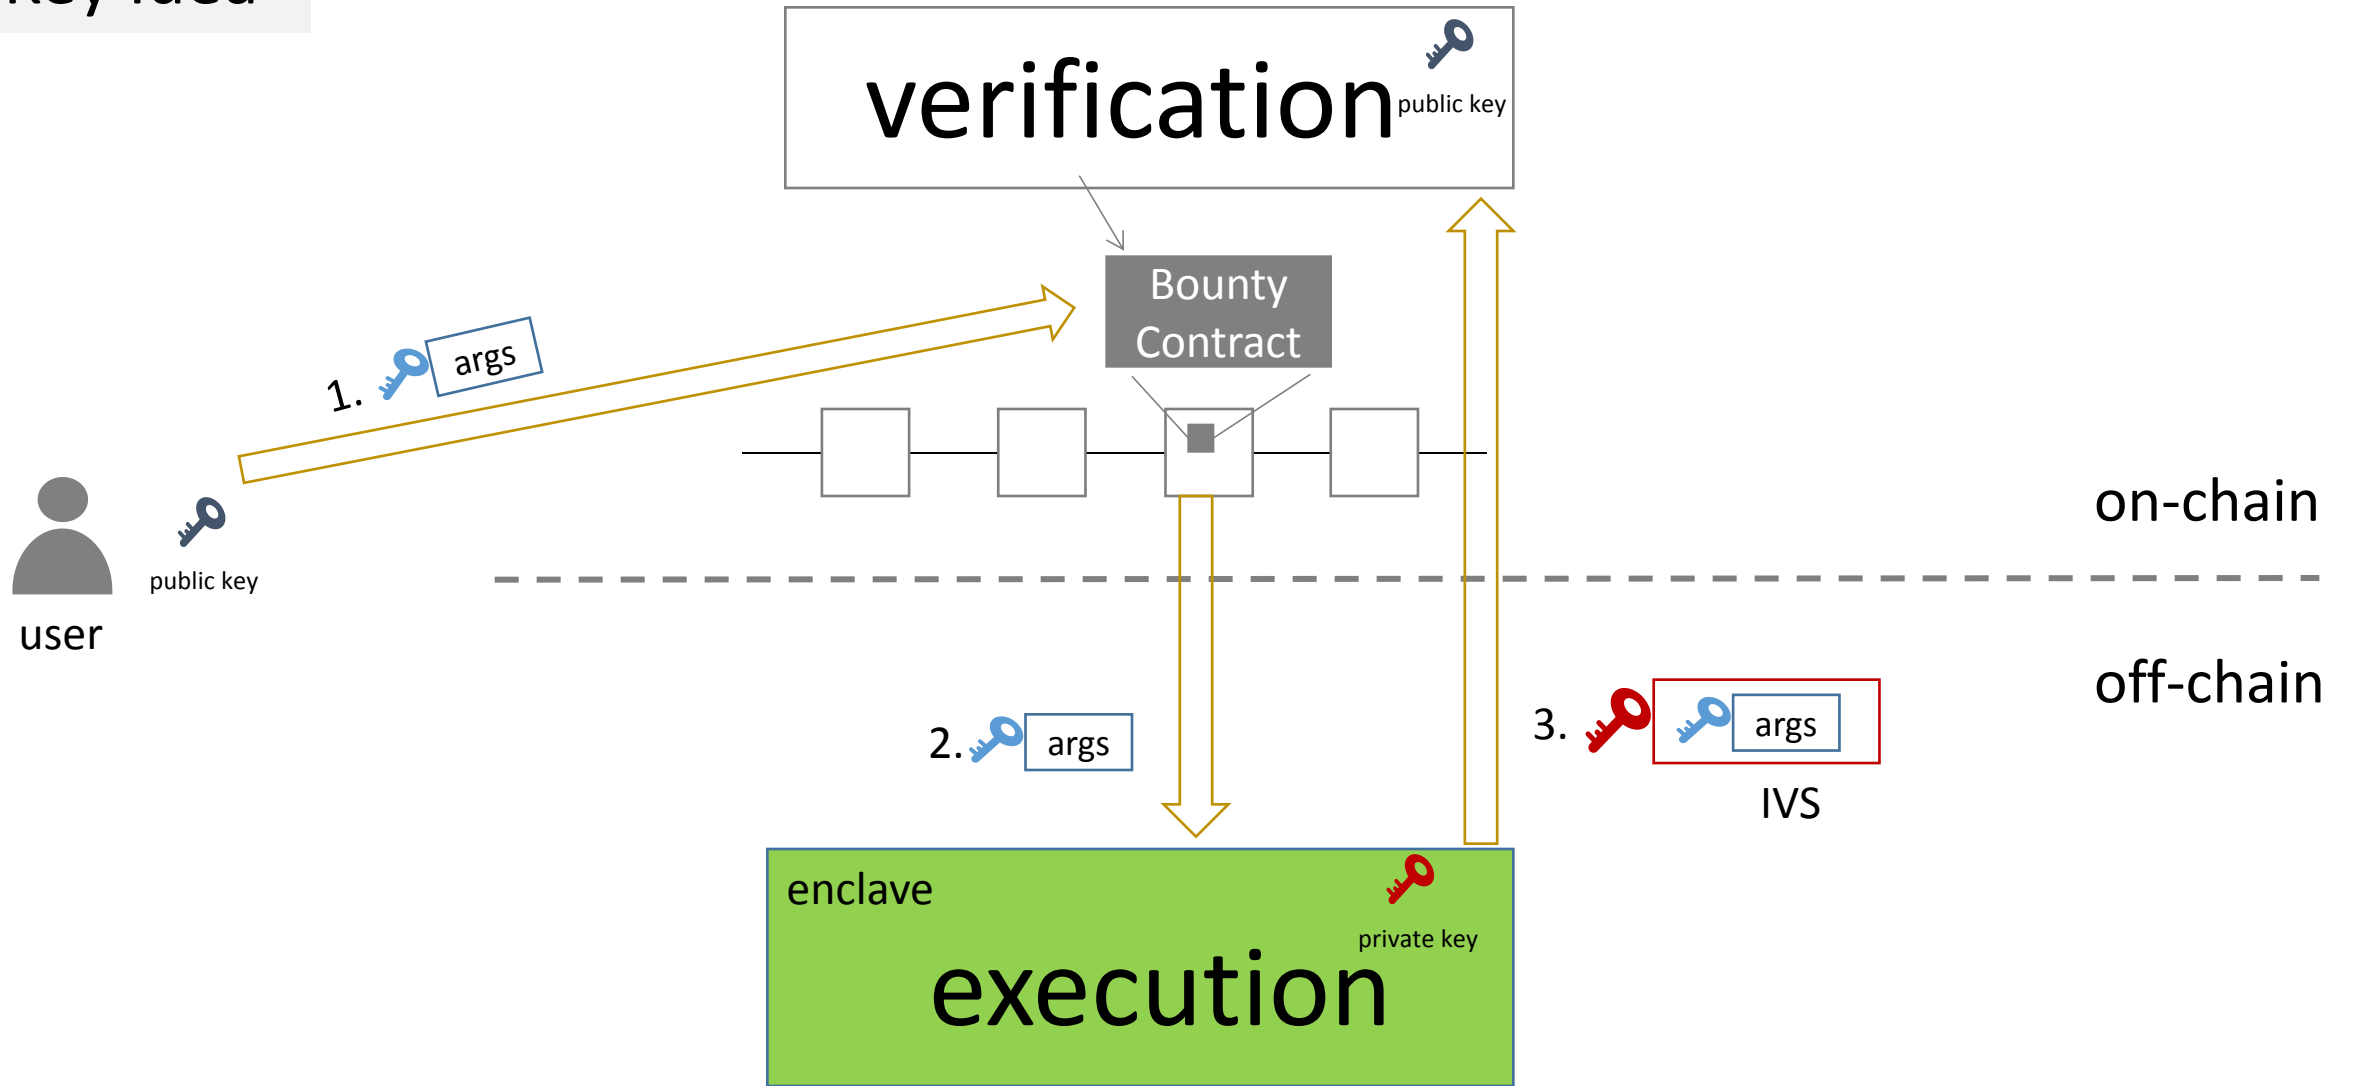

# System Architecture

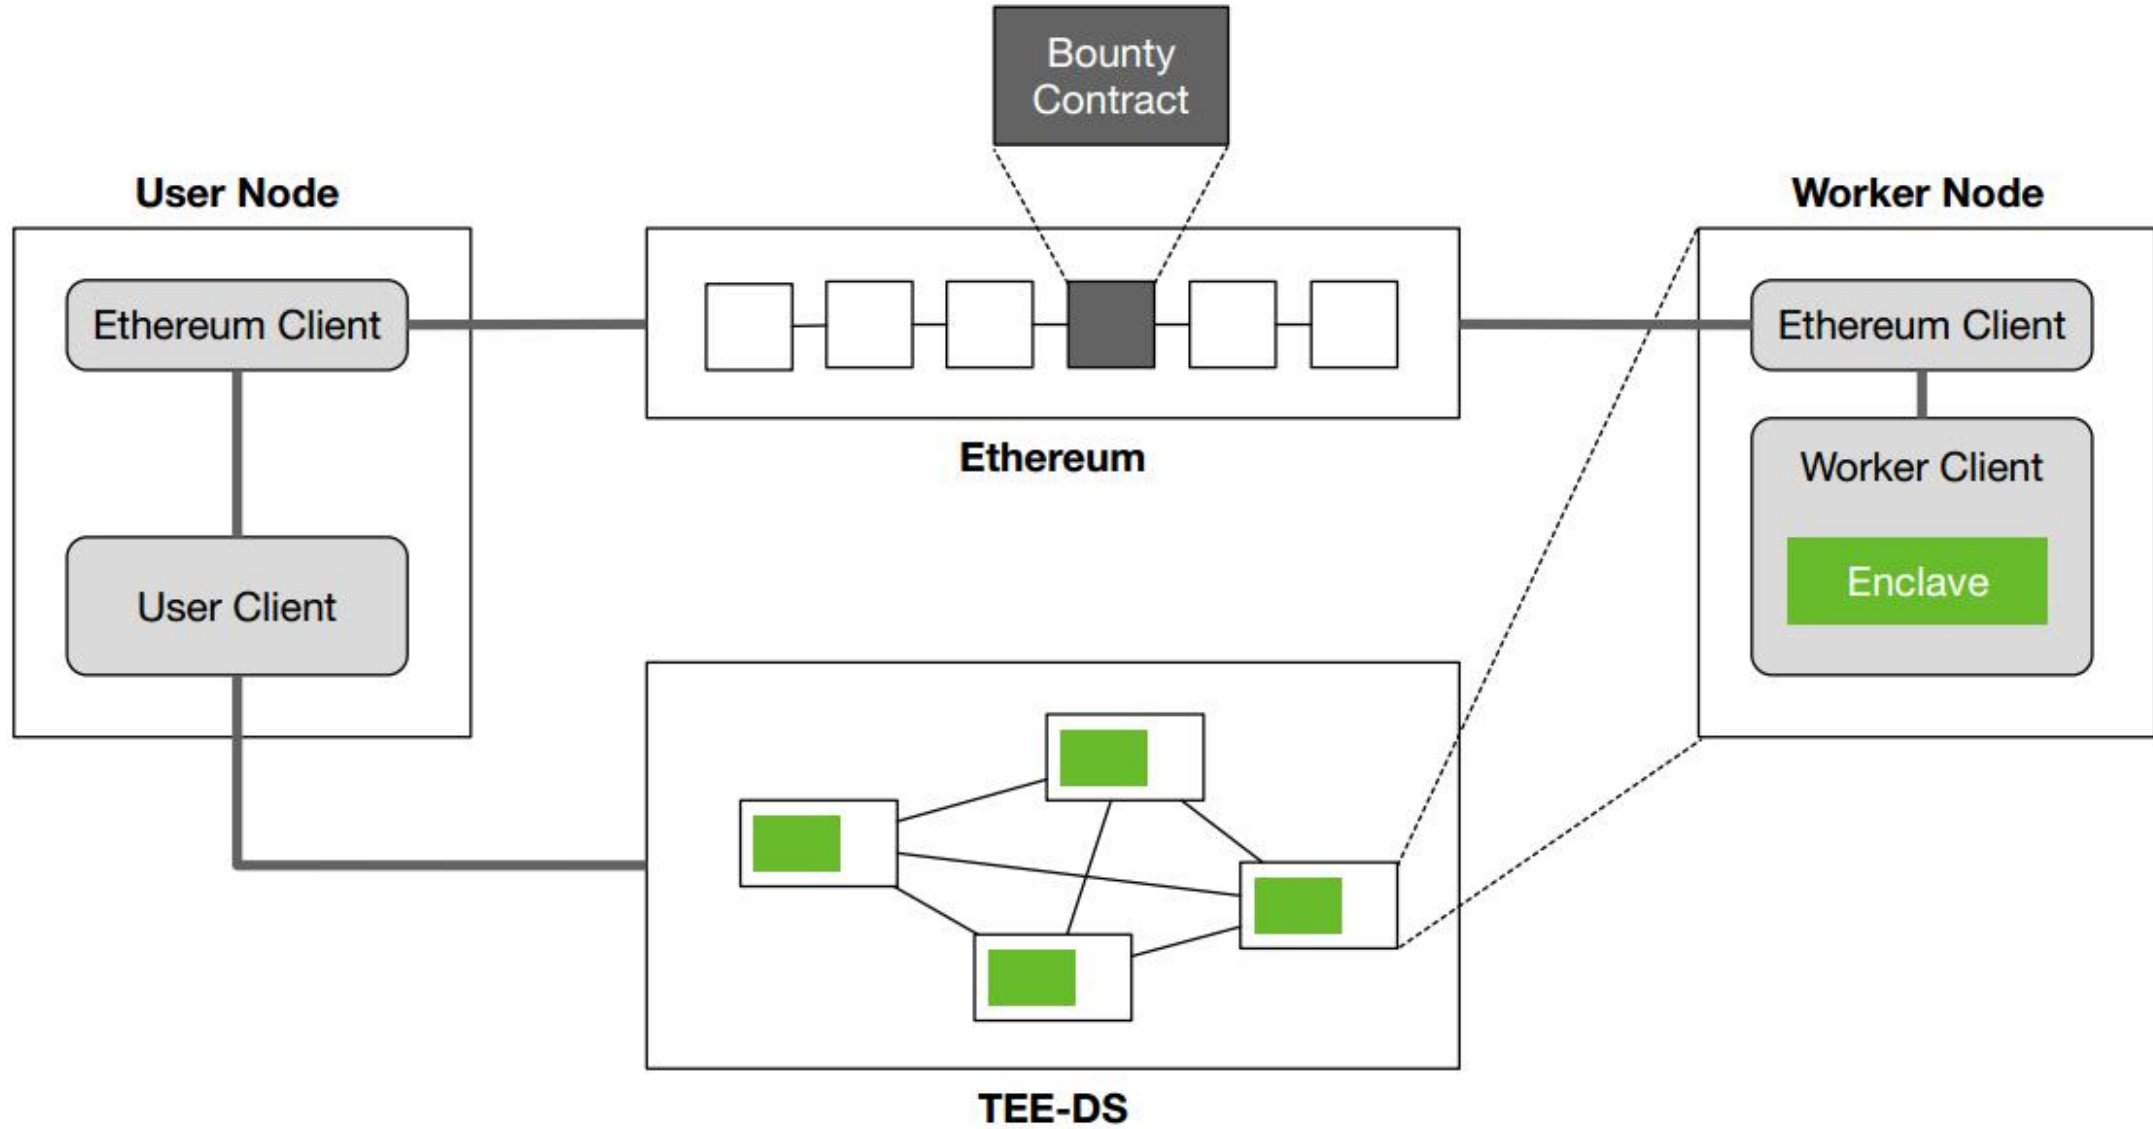

## Contribution

- It presents ShadowEth, a confidential, distributed, trust-less off-chain smart contract system clinging to existing public blockchain network without any modification
- It describes the detailed architecture and protocol of ShadowEth
- It shows the applicability of ShadowEth with three use cases
- It presents a prototype and demonstrates the security and availability of ShadowEth
